# Supplementary material
Source: PubMed Central journal article supplement (PMC3082605)

## Supporting Information

**Table S11:** All the force field parameters used in this study to describe the 2'-hydroxyl torsion.

| <b>Torsion</b>    | <b><math>V_n/2</math> (c27)</b> | <b>Multiplicity</b> | <b>Phase</b> |
|-------------------|---------------------------------|---------------------|--------------|
| HN5 ON5 CN7B CN7B | 0.800                           | 3                   | 0.0          |
| HN5 ON5 CN7B CN7B | 0.000                           | 2                   | 0.0          |
| HN5 ON5 CN7B CN7B | 0.000                           | 1                   | 0.0          |
| HN5 ON5 CN7B CN7  | 0.300                           | 3                   | 0.0          |
| HN5 ON5 CN7B CN7  | 0.000                           | 2                   | 180.0        |
| HN5 ON5 CN7B CN7  | 0.000                           | 1                   | 0.0          |

| <b>Torsion</b>    | <b><math>V_n/2</math> (c27a)</b> | <b>Multiplicity</b> | <b>Phase</b> |
|-------------------|----------------------------------|---------------------|--------------|
| HN5 ON5 CN7B CN7B | 1.000                            | 3                   | 0.0          |
| HN5 ON5 CN7B CN7B | 0.400                            | 2                   | 0.0          |
| HN5 ON5 CN7B CN7B | 0.800                            | 1                   | 0.0          |
| HN5 ON5 CN7B CN7  | 0.200                            | 3                   | 0.0          |
| HN5 ON5 CN7B CN7  | 1.200                            | 2                   | 180.0        |
| HN5 ON5 CN7B CN7  | 2.000                            | 1                   | 0.0          |

| <b>Torsion</b>    | <b><math>V_n/2</math> (c27b)</b> | <b>Multiplicity</b> | <b>Phase</b> |
|-------------------|----------------------------------|---------------------|--------------|
| HN5 ON5 CN7B CN7B | 0.300                            | 3                   | 0.0          |
| HN5 ON5 CN7B CN7B | 0.400                            | 2                   | 0.0          |
| HN5 ON5 CN7B CN7B | 0.800                            | 1                   | 0.0          |
| HN5 ON5 CN7B CN7  | 0.200                            | 3                   | 0.0          |
| HN5 ON5 CN7B CN7  | 0.600                            | 2                   | 180.0        |
| HN5 ON5 CN7B CN7  | 2.000                            | 1                   | 0.0          |

| <b>Torsion</b>    | <b><math>V_n/2</math> (c27c)</b> | <b>Multiplicity</b> | <b>Phase</b> |
|-------------------|----------------------------------|---------------------|--------------|
| HN5 ON5 CN7B CN7B | 0.400                            | 3                   | 0.0          |
| HN5 ON5 CN7B CN7B | 0.400                            | 2                   | 0.0          |
| HN5 ON5 CN7B CN7B | 0.800                            | 1                   | 0.0          |
| HN5 ON5 CN7B CN7  | 0.200                            | 3                   | 0.0          |
| HN5 ON5 CN7B CN7  | 0.400                            | 2                   | 180.0        |
| HN5 ON5 CN7B CN7  | 1.800                            | 1                   | 0.0          |

| <b>Torsion</b>    | <b><math>V_n/2</math> (c27d)</b> | <b>Multiplicity</b> | <b>Phase</b> |
|-------------------|----------------------------------|---------------------|--------------|
| HN5 ON5 CN7B CN7B | 0.400                            | 3                   | 0.0          |
| HN5 ON5 CN7B CN7B | 0.400                            | 2                   | 0.0          |
| HN5 ON5 CN7B CN7B | 0.800                            | 1                   | 0.0          |
| HN5 ON5 CN7B CN7  | 0.200                            | 3                   | 0.0          |
| HN5 ON5 CN7B CN7  | 0.000                            | 2                   | 180.0        |
| HN5 ON5 CN7B CN7  | 2.000                            | 1                   | 0.0          |

| <b>Torsion</b>    | <b><math>V_n/2</math> (c27e)</b> | <b>Multiplicity</b> | <b>Phase</b> |
|-------------------|----------------------------------|---------------------|--------------|
| HN5 ON5 CN7B CN7B | 0.355                            | 3                   | 0.0          |
| HN5 ON5 CN7B CN7B | 0.200                            | 2                   | 0.0          |
| HN5 ON5 CN7B CN7B | 0.400                            | 1                   | 0.0          |
| HN5 ON5 CN7B CN7  | 0.100                            | 3                   | 0.0          |
| HN5 ON5 CN7B CN7  | 0.600                            | 2                   | 180.0        |
| HN5 ON5 CN7B CN7  | 1.000                            | 1                   | 0.0          |

**Table SI2:** Description of non-canonical RNA molecules and their simulation conditions.

|                      | <b>1DQH</b> | <b>1EOR</b>  | <b>1K5I</b>  | <b>1UUU</b>  | <b>1MSY</b> | <b>1L2X</b> | <b>1F7Y</b> | <b>1MME</b> | <b>1Y26</b> |
|----------------------|-------------|--------------|--------------|--------------|-------------|-------------|-------------|-------------|-------------|
| Structure conditions | Xray        | Solution NMR | Solution NMR | Solution NMR | Xray        | Xray        | Xray        | Xray        | Xray        |
| Salt Conditions      | KCl         | KCl          | KCl          | NaCl         | NaCl        | KCl         | NaCl        | NaCl        | MgCl        |
| Simulation Time (ns) | 50ns        | 50ns         | 50ns         | 50ns         | 50ns        | 50ns        | 50ns        | 50ns        | 40ns        |

**Table SI3:** Description of canonical RNA molecules and their simulation conditions.

|                      | <b>1SA9</b> | <b>1SDR</b> | <b>1RNA</b> | <b>1YFV</b>  | <b>18-mer<br/>(no PME)</b> | <b>18-mer<br/>(PME)</b>  |
|----------------------|-------------|-------------|-------------|--------------|----------------------------|--------------------------|
| Structure conditions | Xray        | Xray        | Xray        | Solution NMR | SEQ4 model <sup>56</sup>   | SEQ4 model <sup>56</sup> |
| Salt Conditions      | KCl         | KCl         | NaCl        | KCl          | Na                         | Na                       |
| Simulation Time (ns) | 50ns        | 50ns        | 50ns        | 50ns         | 2x100 ns                   | 2x50 ns                  |

**Table SI4:** Umbrella sampling conditions of each window of the reaction coordinate (C1'-C1' distance).

| <b>Window</b> | <b>End-to-end distance (Å)</b> | <b>Force Constant<br/>(kcal/mol/Å<sup>2</sup>)</b> |
|---------------|--------------------------------|----------------------------------------------------|
| 1             | 10.7                           | 1.2                                                |
| 2             | 11.5                           | 8.0                                                |
| 3             | 12.0                           | 8.0                                                |
| 4             | 12.5                           | 6.0                                                |
| 5             | 13.0                           | 4.0                                                |
| 6             | 13.8                           | 1.6                                                |
| 7             | 14.8                           | 1.6                                                |
| 8             | 16.1                           | 1.6                                                |
| 9             | 17.5                           | 1.6                                                |
| 10            | 18.8                           | 1.6                                                |
| 11            | 20.2                           | 1.6                                                |
| 12            | 21.5                           | 1.6                                                |
| 13            | 22.9                           | 1.6                                                |
| 14            | 24.2                           | 1.6                                                |
| 15            | 25.6                           | 1.6                                                |
| 16            | 26.9                           | 1.6                                                |
| 17            | 27.9                           | 1.6                                                |
| 18            | 28.8                           | 2.0                                                |
| 19            | 29.6                           | 6.0                                                |
| 20            | 30.4                           | 6.5                                                |
| 21            | 31.3                           | 5.0                                                |
| 22            | 32.1                           | 4.0                                                |
| 23            | 33.5                           | 3.0                                                |
| 24            | 34.9                           | 2.0                                                |

**Table SI5:** Average (standard deviation) for the non-hydrogen atom RMSD of non-canonical RNA molecules over 40-50 ns (A) canonical-region (B) non-canonical region.

| (A)        | 1DQH        | 1EOR        | 1K5I        | 1UUU        | 1MSY        | 1L2X        | 1F7Y        | 1MME        | 1Y26 (apo)  | 1Y26 (holo) |
|------------|-------------|-------------|-------------|-------------|-------------|-------------|-------------|-------------|-------------|-------------|
| Charmm27   | 3.93 (1.00) | 2.80 (0.54) | 2.25 (0.59) | 2.00 (0.10) | 2.40 (0.10) | --          | 0.94 (0.29) | 0.99 (0.21) | 3.80 (0.20) | 3.80 (0.20) |
| Charmm27a  | 2.88 (0.57) | 2.24 (0.54) | 1.63 (0.29) | 1.91 (0.42) | 1.89 (0.31) | --          | 0.81 (0.17) | 0.75 (0.18) | 2.22 (0.32) | 1.81 (0.27) |
| Charmm27b  | 2.47 (0.60) | 2.10 (0.44) | 1.71 (0.30) | 2.00 (0.40) | 1.80 (0.10) | --          | 0.72 (0.13) | 0.70 (0.10) | 1.94 (0.10) | 1.84 (0.11) |
| Charmm27c  | 2.63 (0.70) | 2.32 (0.37) | 1.76 (0.29) | --          | --          | --          | 0.72 (0.14) | 0.69 (0.16) | --          | --          |
| Charmm27d  | 2.60 (0.42) | 3.58 (1.47) | 1.78 (0.30) | 2.16 (0.31) | 1.71 (0.20) | --          | 0.75 (0.16) | 0.67 (0.17) | 1.96 (0.11) | 1.79 (0.15) |
| Charmm27e  | 2.70 (0.44) | 2.10 (0.42) | 1.72 (0.35) | --          | --          | --          | 0.77 (0.18) | 0.71 (0.15) | --          | --          |
| <b>(B)</b> |             |             |             |             |             |             |             |             |             |             |
| Charmm27   | 4.90 (3.94) | 0.39 (0.12) | 3.75 (0.35) | 4.60 (0.10) | 2.50 (0.05) | 4.47 (0.60) | 1.37 (0.38) | 2.56 (0.61) | 3.90 (0.10) | 3.90 (0.10) |
| Charmm27a  | 4.29 (4.13) | 0.31 (0.11) | 3.47 (0.47) | 5.04 (1.12) | 1.44 (0.44) | 1.93 (0.22) | 0.94 (0.14) | 1.72 (0.18) | 3.40 (0.45) | 3.04 (0.37) |
| Charmm27b  | 3.85 (4.26) | 0.32 (0.08) | 2.59 (0.63) | 2.51 (0.54) | 1.10 (0.10) | 2.48 (0.51) | 2.41 (1.56) | 1.92 (0.38) | 2.14 (0.50) | 2.01 (0.48) |
| Charmm27c  | 4.15 (4.28) | 0.31 (0.08) | 2.52 (0.55) | --          | --          | 2.66 (0.68) | 3.32 (0.52) | 1.72 (0.14) | --          | --          |
| Charmm27d  | 3.41 (3.53) | 0.40 (0.15) | 2.93 (0.68) | 4.72 (0.51) | 0.96 (0.15) | 2.80 (0.64) | 3.82 (0.94) | 1.69 (0.20) | 2.30 (0.45) | 1.97 (0.50) |
| Charmm27e  | 2.65 (1.82) | 0.31 (0.09) | 2.72 (0.61) | --          | --          | 2.82 (0.50) | 3.89 (0.94) | 3.39 (0.90) | --          | --          |

**Table SI6:** Average for the non-hydrogen atom RMSD of canonical RNA (standard deviation).

|           | 1SA9        | 1SDR        | 1RNA        | 1YFV        |
|-----------|-------------|-------------|-------------|-------------|
| Charmm27  | 1.64 (0.66) | 3.41 (0.59) | 7.54 (1.79) | 1.05 (0.22) |
| Charmm27a | 1.19 (0.24) | 2.57 (0.49) | --          | 1.09 (0.20) |
| Charmm27b | 1.14 (0.21) | 2.51 (0.51) | 2.24 (0.64) | 1.08 (0.20) |
| Charmm27c | 1.13 (0.20) | 2.41 (0.45) | --          | 1.11 (0.21) |
| Charmm27d | 1.15 (0.21) | 1.81 (0.43) | 2.23 (0.62) | 1.09 (0.22) |
| Charmm27e | 1.18 (0.22) | 3.21 (0.71) | --          | 1.03 (0.20) |

**Table SI7:** Quasiharmonic entropies (kcal/mol/K) for 14 central basepairs. Results based on the 40 to 100 ns regions of the trajectories using time frames saved every 5 ps.

| <b>Simulation</b> | <b>S<sub>conf</sub></b> |
|-------------------|-------------------------|
| c27 No PME        | 3.065                   |
| c27d No PME       | 2.784                   |
| c27 PME           | 3.017                   |
| c27d PME          | 2.763                   |

**Figure S11:** Secondary structure representation of non-canonical RNA molecules. Solid line between two nucleic acid bases represent Watson-Crick (WC) type interactions, whereas the dotted lines represent non-canonical interactions involving hydrogen bonds between the corresponding nucleotides. The shaded regions represent the non-canonical regions, and the 5'-ends are denoted by arrows.

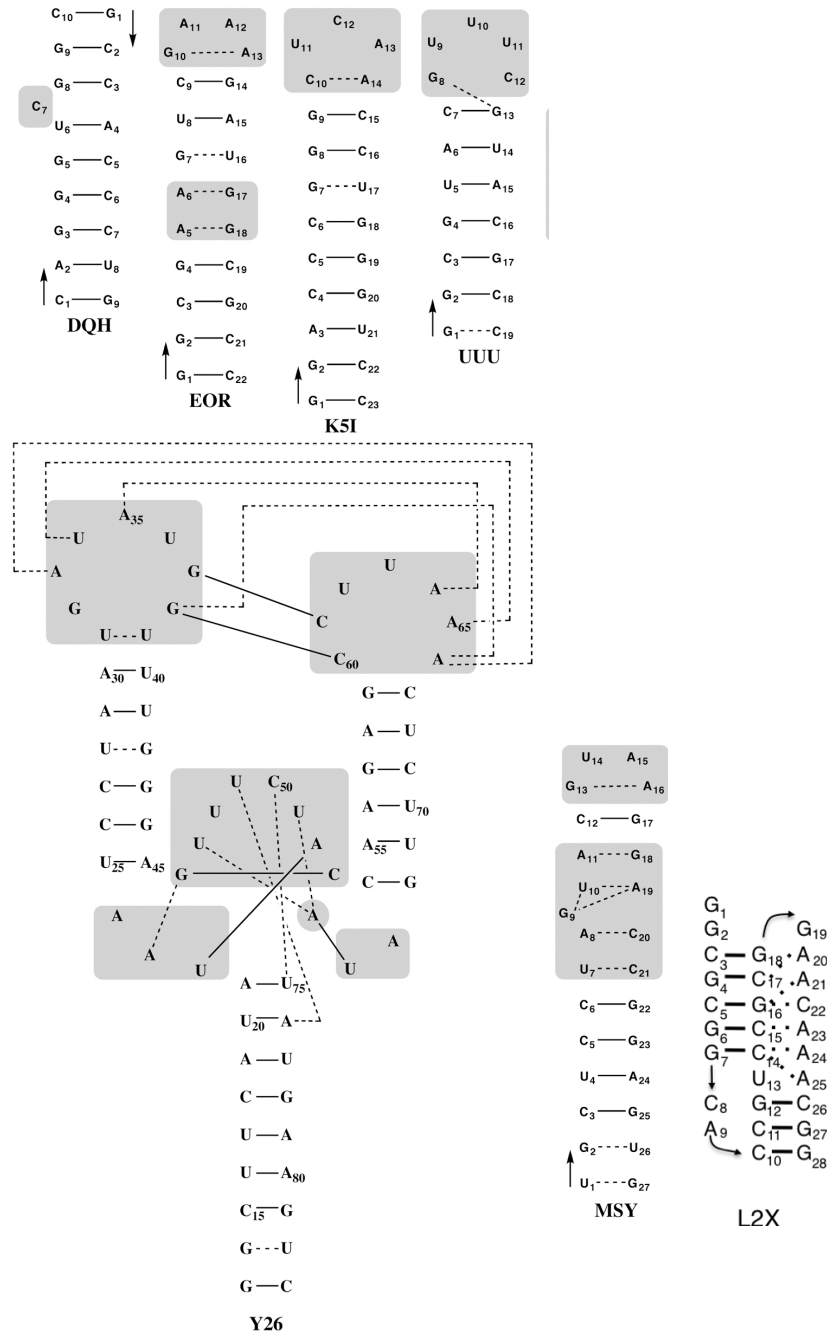

**Figure SI2:** Experimental structures some of the non-canonical RNAs.

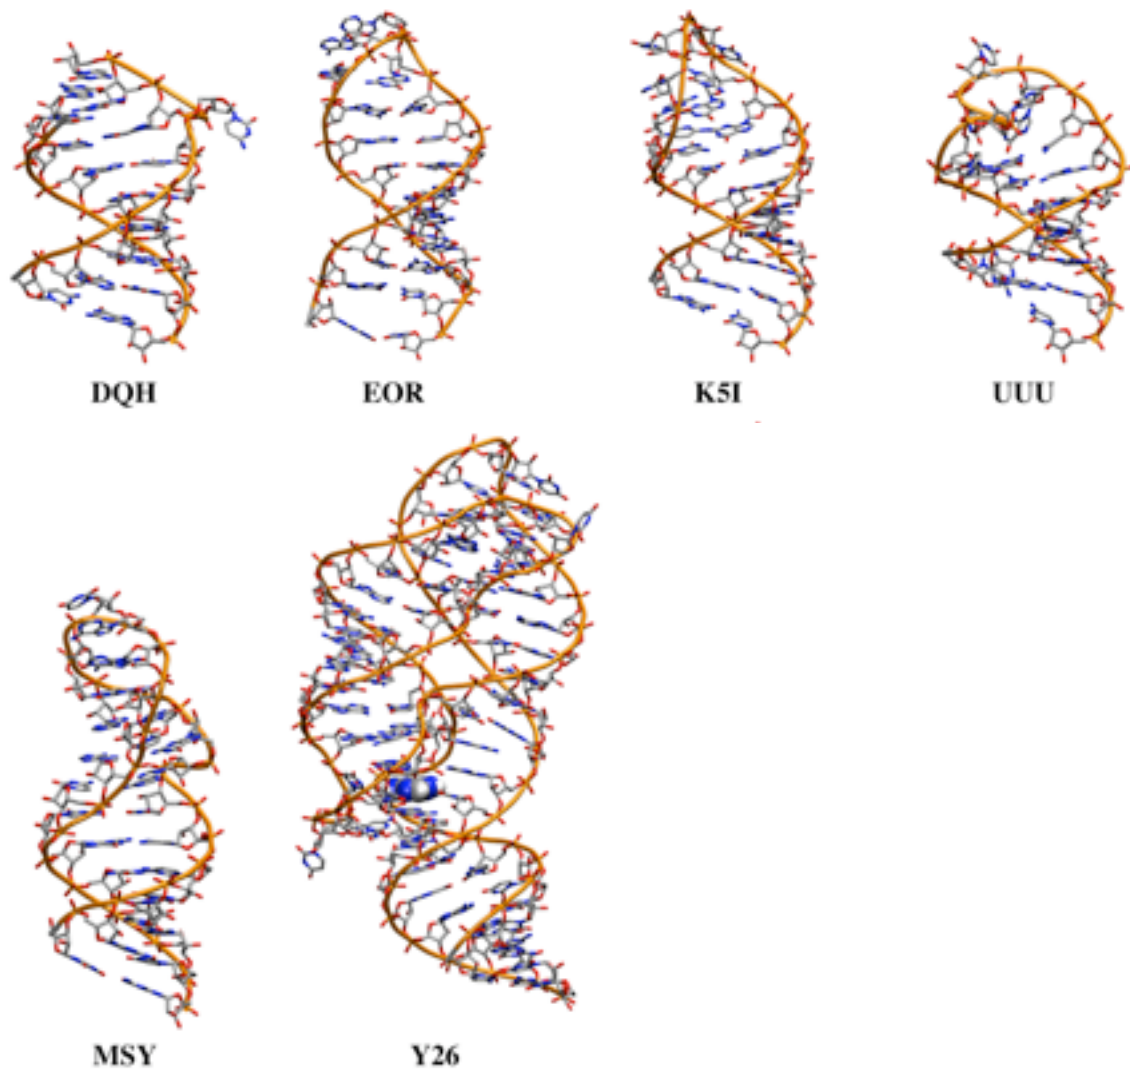



**Figure SI3:** Individual pseudorotation angles of the ribose for the **(A)** 1K5I canonical, **(B)** 1K5I non-canonical, **(C)** 1UUU canonical, and **(D)** 1UUU non-canonical regions to evaluate each of the force field parameter sets. [Solid-blue line represents the original CHARMM27 parameters; Dash-dot lines represent variants of CHARMM27 parameters -- Red: CHARMM27a, yellow: CHARMM27b, magenta: CHARMM27c, green: CHARMM27d, black: CHARMM27e; Solid horizontal-cyan line indicates the region of C3'-endo ribose conformation and the dashed horizontal-cyan lines indicate the region of the C2'-endo ribose conformation].

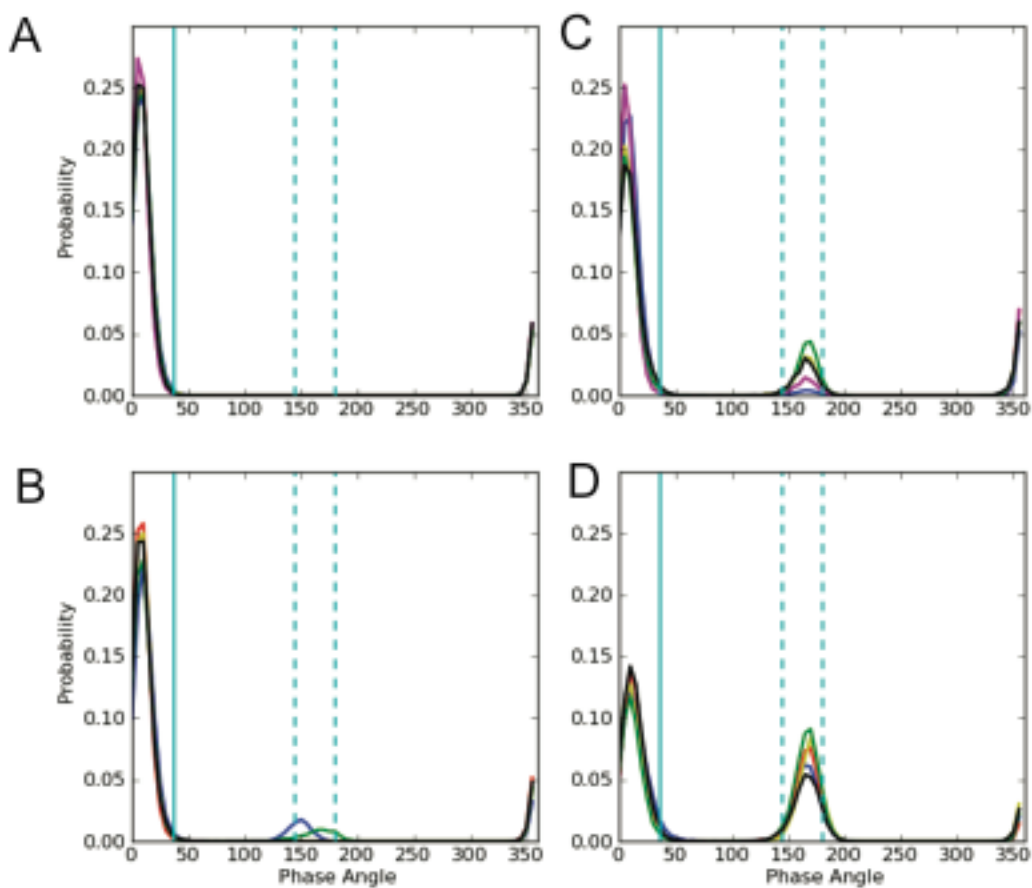

**Figure SI4:** Free energy of folding as a function of the cutoff end-to-end distance used to define the folded and unfolded states of **(A)** 1F7Y **(B)** 1MME. [Blue: CHARMM27, Red: CHARMM27a, Cyan: CHARMM27b, Green: CHARMM27d.]

**(A)**

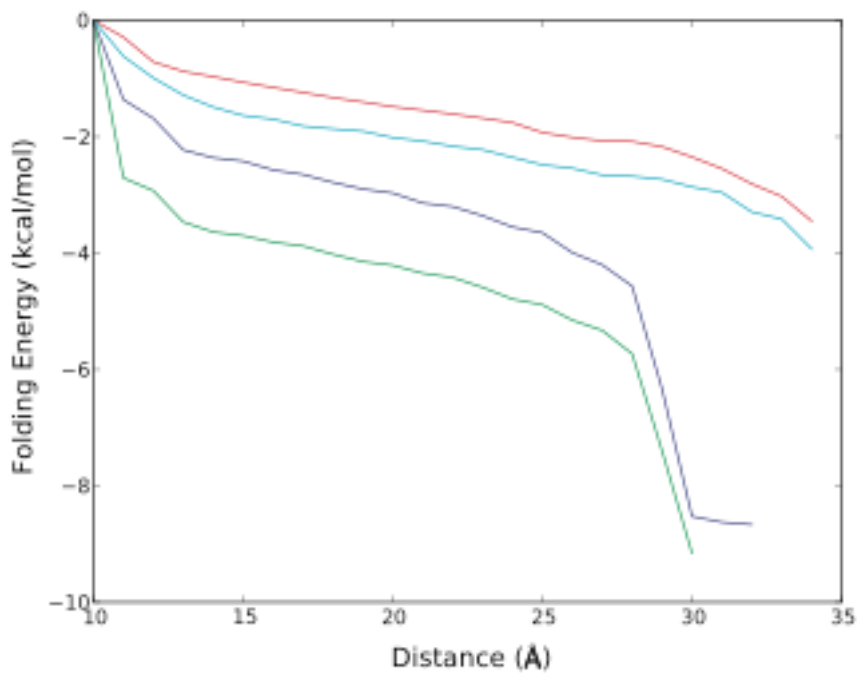

**(B)**

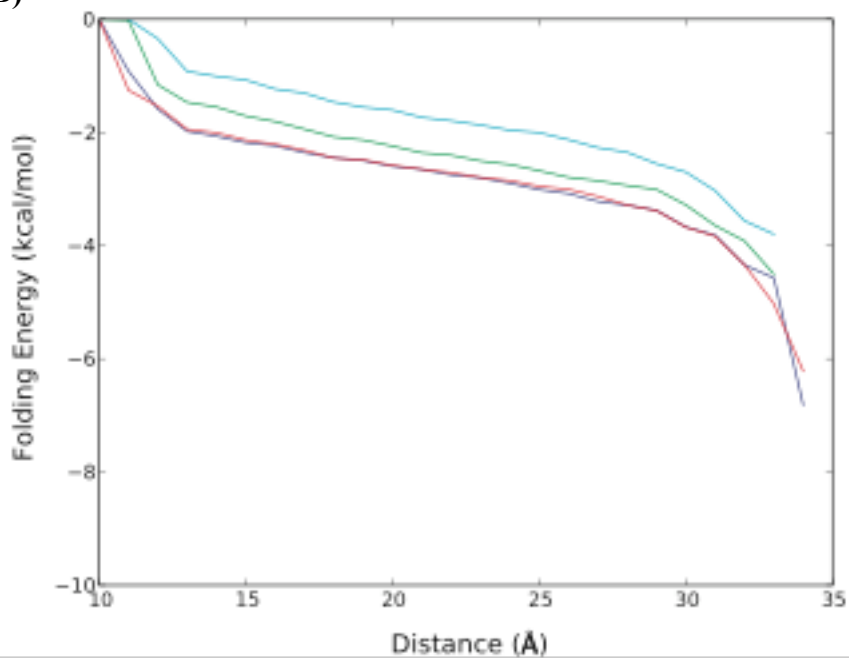

**Figure SI5:** Base-stacking interaction energy for each PMF window which is based on the end-to-end distance values. [Blue: CHARMM27, Red: CHARMM27a, Cyan: CHARMM27b, Green: CHARMM27d.] **(A)** 1F7Y **(B)** 1MME.

**(A)**

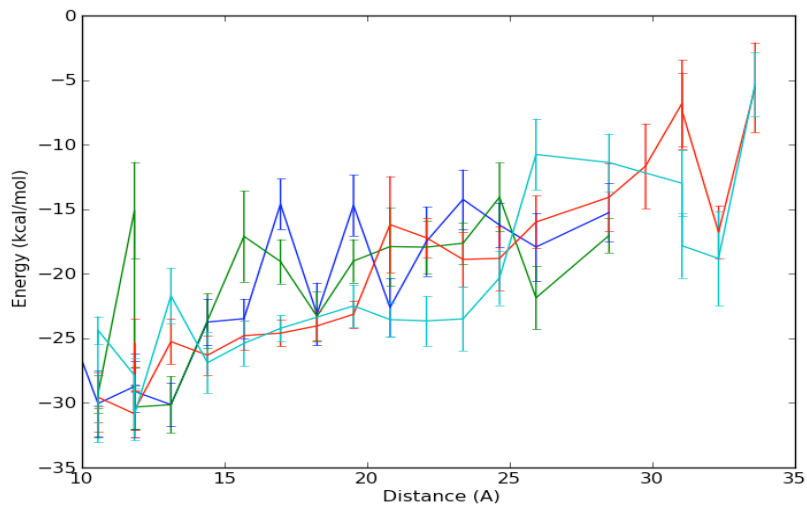

**(B)**

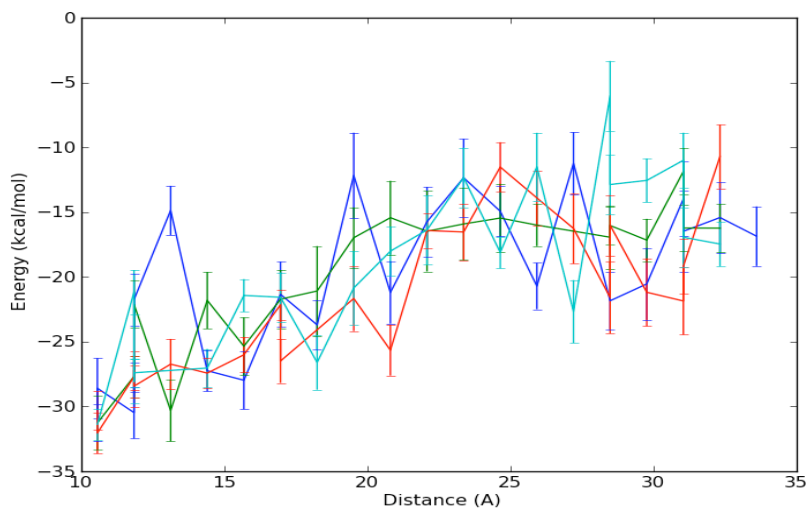

**Figure SI6:** Evaluation of force field parameters based on the probability distribution for selected helicoidal parameters. [Solid-blue line represents the original CHARMM27 parameters; Dash-dot lines represent variants of CHARMM27 parameters -- Red: CHARMM27a, yellow: CHARMM27b, magenta: CHARMM27c, green: CHARMM27d, black: CHARMM27e; Solid cyan line indicates survey-analysis data].

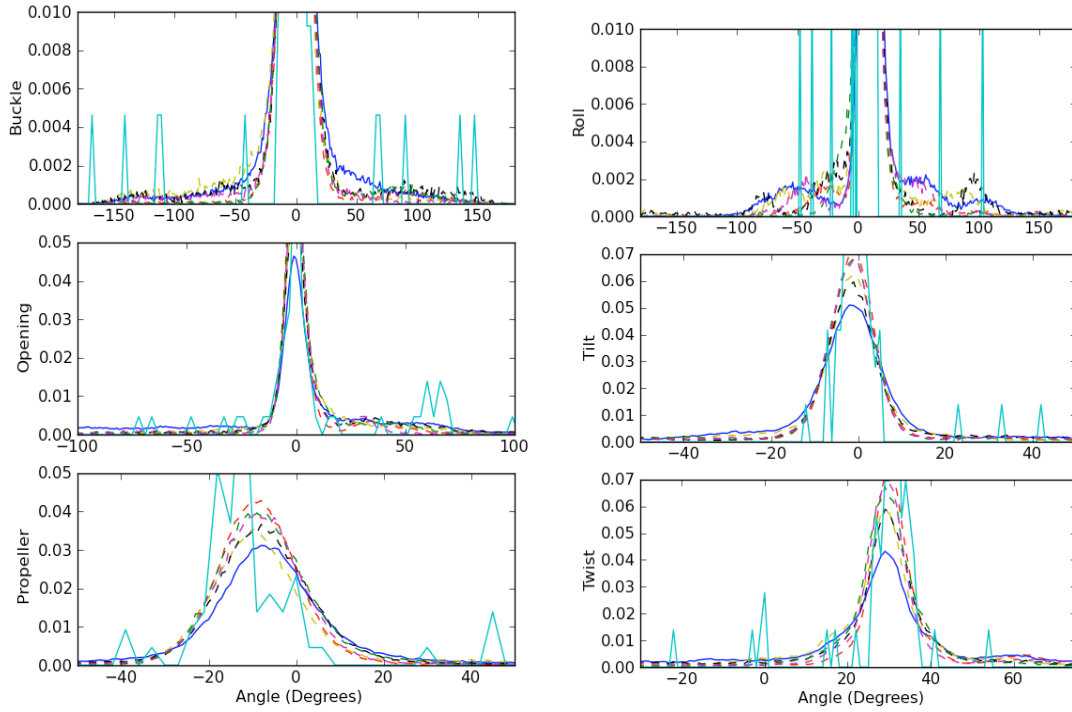

**Figure SI7:** The root mean square fluctuations (RMSF) averaged over each nucleotide based on a backbone alignment for the following force field parameter sets: CHARMM27 (blue), CHARMM27b (yellow), and CHARMM27d (green).

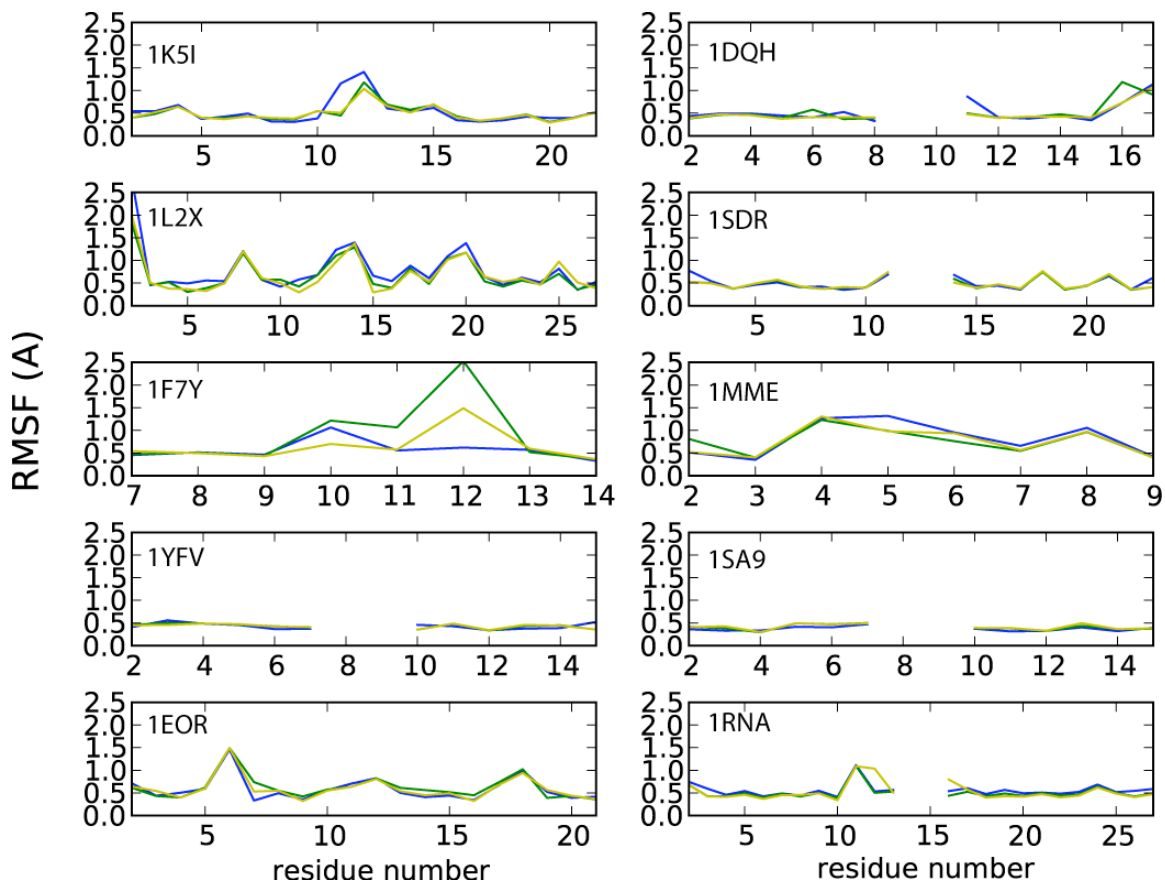

**Figure SI8:** The nucleic acid root mean square fluctuations (RMSF) averaged over each nucleotide base based on a backbone alignment for the following force field parameter sets: CHARMM27 (blue), CHARMM27b (yellow), and CHARMM27d (green).

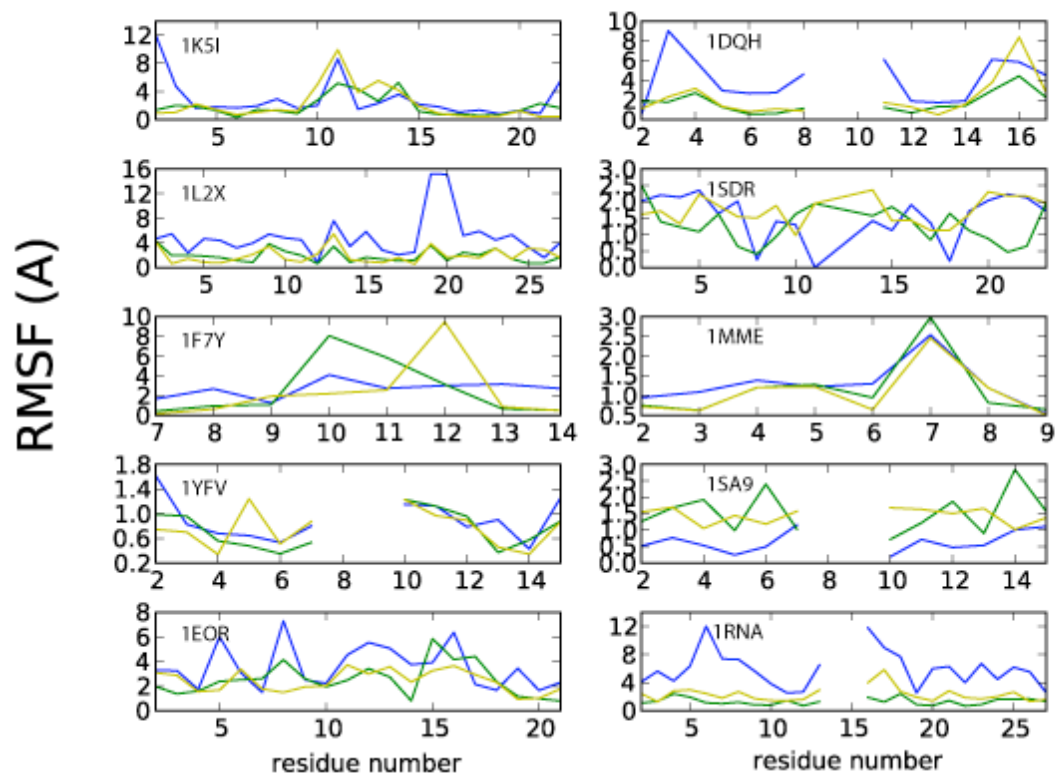

**Figure SI9:** Results from 18mer RNA. N1-N3 distance distributions for 14 central basepairs distributions. [Blue: Original CHARMM; Green: CHARMM27d] **(A)** No PME **(B)** PME.

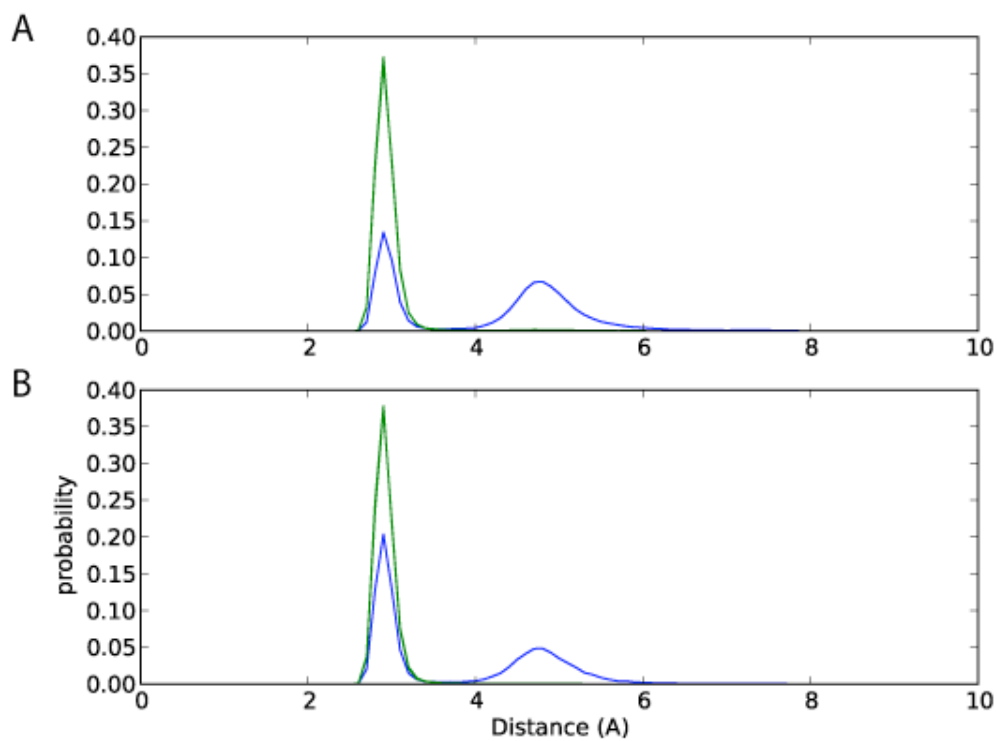

**Figure SI10:** Results from 18mer RNA. 2'hydroxyl distributions for 14 central basepairs distributions. [Blue: Original CHARMM; Green: CHARMM27d] **(A)** No PME **(B)** PME.

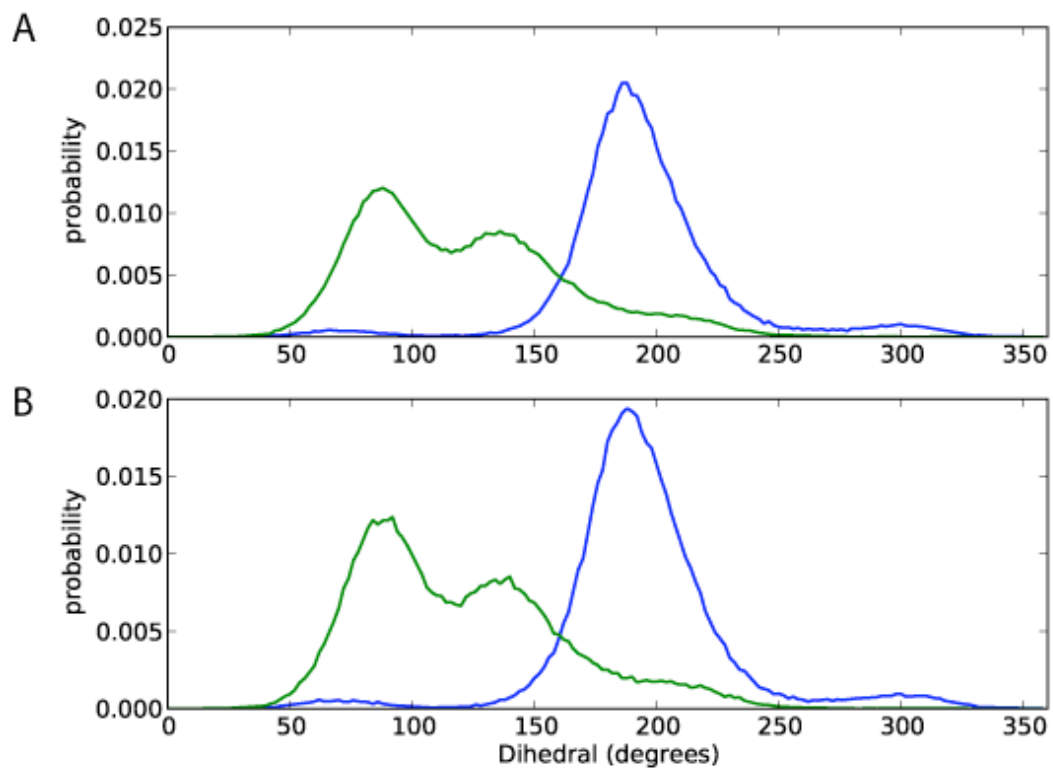

Supplement: NIHMS272247-supplement-Supp_Table_S1-S7___Figure_S1-S10.pdf [file NIHMS272247-supplement-Supp_Table_S1-S7___Figure_S1-S10.pdf]
